# Supplementary material for: Prevalence and factors associated with fatigue in patients with psoriatic arthritis: a systematic review and meta-analysis
Source: Research Square preprint supplement (doi:10.21203/rs.3.rs-4361194/v1), 2024-06-06
Supplement: Supplementary file 1 [file 669184ba2acac896cbbebaeb.docx]

Supplementary Data S1. Search strategies

**1.PubMed**

"spondylarthritis"[MeSH Terms] OR "spondylarthritis"[All Fields] OR "spondyloarthritis"[All Fields] OR ("arthritis, psoriatic"[MeSH Terms] OR ("arthritis"[All Fields] AND "psoriatic"[All Fields]) OR "psoriatic arthritis"[All Fields] OR ("psoriatic"[All Fields] AND "arthritis"[All Fields])) AND (“Fatigue”[MeSH Terms] OR “Fatigue”[All Fields] OR Asthenia* OR Lassitude[All Fields] OR Exhaust*[All Fields] OR Inertia[All Fields] or Drows*[All Fields] OR Letharg*[All Fields] OR (Tiring[All Fields] OR Tired*[ All Fields] OR Weary[All Fields] OR Weariness[All Fields]))

**2. Google Scholar**

1. With all of the words: spondylarthritis, fatigue

a. Titles and abstracts for the first 10 pages of results

2. With all of the words: spondyloarthropathy, fatigue

a. Titles and abstracts for the first 10 pages of results

**3. Embase**

1. exp spondyloarthropathy/

2. (Spondylarthr* or Spondyloarthr* or Spondyloarthritis):ti,ab,kw.

3. 1 or 2

4. exp psoriatic arthritis/

5. (psoria* and (arthriti* or arthropath*)):ti,ab,kw.

6. 4 or 5

7. 3 or 6

8. exp fatigue/

9. fatigue:ti,ab,kw.

10. asthenia*: ti,ab,kw.

11. lassitude:ti,ab,kw.

12. inertia:ti,ab,kw.

13. drows*:ti,ab,kw.

14. letharg*:ti,ab,kw.

15. (tiring OR tired*):ti,ab,kw.

16. (weary OR weariness):ti,ab,kw.

17. 8 OR 9 OR 10 OR 11 OR 12 OR 13 OR 14 OR 15 OR 16

18. 7 AND 17

**4. Web of Science**

(TS=(spondyloarthritis) OR TS=(spondyloarthropathy) OR TS=(psoriatic arthritis) AND (TS=(Fatigue) **OR TS=(asthenia)) OR TS=(lassitude)) OR TS=(inertia)) OR TS=(drows*)) OR TS=(letharg*)) OR TS=(Tiring or tired*)) OR TS=(weary or weariness))**

**5. Medline**

exp spondyloarthropathy/ OR (Spondylarthr* or Spondyloarthr* or Spondyloarthritis).ti,ab,kw. OR exp psoriatic arthritis/ or (psoria* and (arthriti* or arthropath*)).ti,ab,kw. AND (exp fatigue/ OR (Asthenia* OR Lassitude OR Exhaust* OR Inertia or Drows* OR Letharg* OR Tiring OR Tired* OR Weary OR Weariness).ti,ab,kw.)

**6. CINAHL**

1. (MH "spondyloarthropathy+") OR (Spondylarthr* or Spondyloarthr* or Spondyloarthritis) OR (MH "psoriatic arthritis+") OR (psoria* and (arthriti* or arthropath*))

2. (MH "fatigue+") OR Asthenia* OR Lassitude OR Exhaust* OR Inertia or Drows*

OR Letharg* OR Tiring OR Tired* OR Weary OR Weariness)

3. #1 AND #2

**7. Cochrane Library**

1. MeSH descriptor: [Spondylarthritis] explode all trees

2. MeSH descriptor: [Fatigue] explode all trees

3. MeSH descriptor: [Arthritis, Psoriatic] explode all trees

4. (Spondylarthr* or Spondyloarthr* or Spondyloarthritis):ti,ab,kw

5. (Asthenia* OR Lassitude OR Exhaust* OR Inertia or Drows* OR Letharg* OR Tiring OR Tired* OR Weary OR Weariness):ti,ab,kw

6. #1 or #3 or #4

7. #2 or #5

8. #6 and #7

Supplementary Table S1. General information on the included articles

| Study | Study Design | Country | Sample Size | Age, Mean (Standard Deviation) | Male (%) | Disease Duration (year), mean (standard deviation) | PASI, mean (standard deviation) | Treatment (%) | Current Biologic Use | Classification Criteria |
| --- | --- | --- | --- | --- | --- | --- | --- | --- | --- | --- |
| Chauffier et al., 2013 1 | Cross-sectional | France | 47 | NR | NR | NR | NR | NR | NR | Classification Criteria for Psoriatic Arthritis (CASPAR) criteria |
| Coates et al., 2020 2 | Cross-sectional | Multinational | 1286 | 41.2 (13.3) | 48% | 9.0 (8.6) | NR | bDMARD: 38%; oral DMARD only: 33%; oral DMARD +bDMARD: 18%; NASIDs/steroids only: 11% | 56% | NR |
| Duruöz et al., 2020 3 | Cross-sectional | Turkey | 1028 | 47 (12.2) | 34.1% | 6.4 (7.3) | 1.4 (3.2) | NR | NR | Classification Criteria for Psoriatic Arthritis (CASPAR) criteria |
| Giacomelli et al., 2015 4 | Cross-sectional | Italy | 214 | NR | NR | NR | NR | Biologic: 68.7% | 68.70% | Classification Criteria for Psoriatic Arthritis (CASPAR) criteria |
| Gossec et al., 2022 5 | Cross-sectional | Multinational | 831 | 47.5 (13.4) | 53.1% | 5.3 (6.6) | NR | Biologic: 48.1% | 48.10% | NR |
| Gudu et al., 2016 6 | Cross-sectional | Multinational | 246 | 51.2 (13.5) | 48.4% | 10.0 (10.2) | NR | Biologic: 34.4%; synthetic DMARD: 65.1% | 34.40% | Classification Criteria for Psoriatic Arthritis (CASPAR) criteria |
| Haugeberg et al., 2020 7 | Cross-sectional | Norway | 137 | 52.3 (10.3) | 50% | 8.8 (6.8) | 2.6 (3.7) | bDMARD: 32.4%; csDMARD: 58.4% | 32.40% | Classification Criteria for Psoriatic Arthritis (CASPAR) criteria |
| Hustad et al., 2009 8 | Cross-sectional | Canada | 499 | 48.5 (12.8) | 57% | NR | 6 (8.9) | Ever used NASID: 79.2%; ever used DMARD: 50.9%; ever used immunosuppressive drug: 56.7%; ever used MTX: 56.7%; ever used oral steroids: 17.4%; ever used biologic: 5% | NR | Classification Criteria for Psoriatic Arthritis (CASPAR) criteria |
| Krajewska-Wlodarczyk et al., 2020 9 | Cross-sectional | Poland | 60 | 49.7 (8.8) | 50% | 7.6 (7.4) | 9.7 (8.0) | NR | NR | Classification Criteria for Psoriatic Arthritis (CASPAR) criteria |
| Lai et al., 2021 10 | Cross-sectional | Hong Kong | 231 | 52.3 (12.2) | 65.4% | NR | NR | Single conventional DMARD: 38.1%; dual conventional DMARDs: 12.6%; MTX: 35.5%; SSZ: 19%; LEF: 5.6%; CsA: 8.2%; biologic: 19.5%; anti-TNF: 12.1% | 19.50% | Classification Criteria for Psoriatic Arthritis (CASPAR) criteria |
| López-Medina et al., 2016 11 | Cross-sectional | Spain | 507 | NR | NR | NR | NR | NR | NR | Classification criteria of the European Spondyloarthropathy Study Group (ESSG) |
| Overman et al., 2016 12 | Cross-sectional | Multinational | 118 | NR | NR | NR | NR | NR | NR | NR |
| Pilgaard et al., 2019 13 | Cross-sectional | Denmark | 85 | NR | NR | NR | NR | NR | NR | NR |
| Skougaard et al., 2020 14 | Cross-sectional | Denmark | 1062 | NR | 51.3% | NR | NR | Biologic: 43.1%; MTX: 60.8%; steroids: 1.2% | 43.10% | NR |
| Tan et al., 2020 15 | Cross-sectional | Singapore | 131 | 50.1 (13.5) | 50.4% | NR | NR | cDMARDs: 74.8%; bDMARDs: 11.8% | 11.80% | Classification Criteria for Psoriatic Arthritis (CASPAR) criteria |

NR: not reported; DMARD: disease-modifying anti-rheumatic drug; bDMARD: biologic disease-modifying anti-rheumatic drug; NASID: nonsteroidal anti-inflammatory drug; csDMARD: conventional synthetic disease-modifying anti-rheumatic drug; MTX: methotrexate; SSZ: sulfasalazine; LEF: leflunomide; CsA: cyclosporine; anti-TNF: anti-tumor necrosis factor

Supplementary Table S2. Information on fatigue in the included articles

| Study | Fatigue Tool | Fatigue Primary Objective | Fatigue Definition |
| --- | --- | --- | --- |
| Chauffier et al., 2013 | Visual Analogue Scale (VAS): 0-100 mm | Yes | Significant fatigue: VAS>50 mm |
| Coates et al., 2020 | 12-item Psoriatic Arthritis Impact of Disease (PsAID-12) questionnaire | No | NR |
| Duruöz et al., 2020 | FACIT-F (Functional Assessment of Chronic Illness Therapy – Fatigue) | Yes | Significant fatigue: FACIT-F ≤ 30 |
| Giacomelli et al., 2015 | Visual Analogue Scale (VAS): 0-100 mm | No | NR |
| Gossec et al., 2022 | 12-item Psoriatic Arthritis Impact of Disease fatigue question: 0-10cm | Yes | Fatigue: Psoriatic Arthritis Impact of Disease fatigue question score > 0 |
| Gudu et al., 2016 | Numerical Rating Scale (NRS): 0–10 cm | Yes | Significant fatigue: NRS > 5/10 |
| Haugeberg et al., 2020 | Numerical Rating Scale (NRS): 0–10 cm | Yes | Fatigue: NRS ≥ 5 |
| Hustad et al., 2009 | Modified fatigue severity scale (mFSS) | Yes | Significant fatigue: mFSS ≥ 5 |
| Krajewska-Wlodarczyk et al., 2020 | FACIT-F (Functional Assessment of Chronic Illness Therapy – Fatigue) | Yes | Fatigue: FACIT-F ≤ 24 |
| Lai et al., 2021 | FACIT-F (Functional Assessment of Chronic Illness Therapy – Fatigue) | Yes | Significant fatigue: FACIT-F < 30 |
| López-Medina et al., 2016 | BASDAI-Fatigue Question | Yes | Significant fatigue: BASDAI-Fatigue > 5 |
| Overman et al., 2016 | Vitality scale of the RAND version of the SF 36-item Health Survey (RAND(SF)-36) | Yes | Significant fatigue: RAND(SF)-Vitality score ≤35 |
| Pilgaard et al., 2019 | FACIT-F (Functional Assessment of Chronic Illness Therapy – Fatigue) | Yes | Fatigue: FACIT ≤ 39 |
| Skougaard et al., 2020 | Visual Analogue Scale: 0-100 mm | Yes | Fatigue: VAS ≥ 57 |
| Tan et al., 2020 | BASDAI-Fatigue Question | Yes | Significant fatigue: BASDAI-Fatigue > 5 |

NR: not reported; BASDAI: Bath Ankylosing Spondylitis Disease Activity Index

Supplementary Table S3. Study quality assessment for cross-sectional studies

| Study | Q1. Were the criteria for inclusion in the sample clearly defined? | Q2. Were the study subjects and the setting described in detail? | Q3. Was the exposure measured in a valid and reliable way? | Q4. Were objective, standard criteria used for measurement of the condition? | Q5. Were confounding factors identified? | Q6. Were strategies to deal with confounding factors stated? | Q7. Were the outcomes measured in a valid and reliable way? | Q8. Was appropriate statistical analysis used? |
| --- | --- | --- | --- | --- | --- | --- | --- | --- |
| Chauffier et al., 2013 | Y | Y | Y | Y | Y | Y | Y | Y |
| Coates et al., 2020 | Y | Y | Y | UC | NA | NA | UC | Y |
| Duruöz et al., 2020 | Y | Y | Y | Y | UC | UC | Y | Y |
| Giacomelli et al., 2015 | Y | Y | Y | Y | Y | Y | UC | Y |
| Gossec et al., 2022 | Y | Y | Y | UC | Y | Y | Y | Y |
| Gudu et al., 2016 | Y | Y | Y | Y | Y | Y | Y | Y |
| Haugeberg et al., 2020 | Y | Y | Y | Y | Y | Y | Y | Y |
| Hustad et al., 2009 | Y | Y | Y | Y | Y | Y | Y | Y |
| Krajewska-Wlodarczyk et al., 2020 | Y | Y | Y | Y | Y | Y | Y | Y |
| Lai et al., 2021 | Y | Y | Y | Y | Y | UC | Y | Y |
| López-Medina et al., 2016 | Y | Y | Y | Y | Y | Y | Y | Y |
| Overman et al., 2016 | Y | Y | Y | UC | Y | Y | Y | Y |
| Pilgaard et al., 2019 | Y | Y | Y | UC | Y | Y | Y | Y |
| Skougaard et al., 2020 | Y | Y | Y | UC | Y | Y | Y | Y |
| Tan et al., 2020 | Y | Y | Y | Y | Y | Y | Y | Y |

Y: yes; N: no; UC: unclear; NA: not applicable

References of Included Studies

1. Chauffier K, Paternotte S, Burki V, et al. Fatigue in spondyloarthritis: a marker of disease activity. A cross-sectional study of 266 patients. *CLINICAL AND EXPERIMENTAL RHEUMATOLOGY*. NOV-DEC 2013;31(6):864-870.

2. Coates LC, Orbai AM, Azevedo VF, et al. Results of a global, patient-based survey assessing the impact of psoriatic arthritis discussed in the context of the Psoriatic Arthritis Impact of Disease (PsAID) questionnaire. *HEALTH AND QUALITY OF LIFE OUTCOMES*. JUN 8 2020;18(1)173. doi:10.1186/s12955-020-01422-z

3. Duruöz MT, Gezer HH, Nas K, et al. The impact of fatigue on patients with psoriatic arthritis: a multi-center study of the TLAR-network. *Rheumatol Int*. Nov 2020;40(11):1803-1815. doi:10.1007/s00296-020-04628-y

4. Giacomelli R, Gorla R, Trotta F, et al. Quality of life and unmet needs in patients with inflammatory arthropathies: results from the multicentre, observational RAPSODIA study. *RHEUMATOLOGY*. MAY 2015;54(5):792-797. doi:10.1093/rheumatology/keu398

5. Gossec L, Walsh JA, Michaud K, et al. Effect of Fatigue on Health-Related Quality of Life and Work Productivity in Psoriatic Arthritis: Findings From a Real-World Survey. *The Journal of rheumatology*. 2022;49(11):1221-1228. doi:<https://dx.doi.org/10.3899/jrheum.211288>

6. Gudu T, Etcheto A, de Wit M, et al. Fatigue in psoriatic arthritis - a cross-sectional study of 246 patients from 13 countries. *Joint Bone Spine*. 2016;83(4):439-443. doi:10.1016/j.jbspin.2015.07.017

7. Haugeberg G, Hoff M, Kavanaugh A, Michelsen B. Psoriatic arthritis: exploring the occurrence of sleep disturbances, fatigue, and depression and their correlates. *ARTHRITIS RESEARCH & THERAPY*. AUG 26 2020;22(1)198. doi:10.1186/s13075-020-02294-w

8. Husted JA, Tom BD, Schentag CT, et al. Occurrence and correlates of fatigue in psoriatic arthritis. *Annals of the Rheumatic Diseases*. 2009;68(10):1553-1558. doi:10.1136/ard.2008.098202

9. Krajewska-Wlodarczyk M, Owczarczyk-Saczonek A, Placek W. Prevalence and severity of fatigue in psoriasis and psoriatic arthritis. *POSTEPY DERMATOLOGII I ALERGOLOGII*. 2020;37(1):46-51. doi:10.5114/ada.2019.83629

10. Lai TL, Au CK, Chung HY, Leung MC, Ng WL, Lau CS. Fatigue in psoriatic arthritis: Is it related to disease activity? Article. *International Journal of Rheumatic Diseases*. 2021;24(3):418-425. doi:10.1111/1756-185X.14069

11. López-Medina C, Schiotis RE, Font-Ugalde P, et al. Assessment of Fatigue in Spondyloarthritis and Its Association with Disease Activity. *J Rheumatol*. Apr 2016;43(4):751-7. doi:10.3899/jrheum.150832

12. Overman CL, Kool MB, Da Silva JAP, Geenen R. The prevalence of severe fatigue in rheumatic diseases: an international study. *Clinical rheumatology*. 2016;35(2):409-15. doi:<https://dx.doi.org/10.1007/s10067-015-3035-6>

13. Pilgaard T, Hagelund L, Stallknecht SE, Jensen HH, Esbensen BA. Severity of fatigue in people with rheumatoid arthritis, psoriatic arthritis and spondyloarthritis–Results of a cross-sectional study. *PloS one*. 2019;14(6):e0218831.

14. Skougaard M, Jorgensen TS, Rifbjerg-Madsen S, et al. Relationship Between Fatigue and Inflammation, Disease Duration, and Chronic Pain in Psoriatic Arthritis: An Observational DANBIO Registry Study. *The Journal of rheumatology*. 2020;47(4):548-552. doi:<https://dx.doi.org/10.3899/jrheum.181412>

15. Tan JSQ, Fong W, Kwan YH, Leung YY. Prevalence and variables associated with fatigue in psoriatic arthritis: a cross-sectional study. *Rheumatology international*. 2020;40(11):1825-1834. doi:<https://dx.doi.org/10.1007/s00296-020-04678-2>
